# Supplementary material for: A coagulation defect arising from heterozygous premature termination of tissue factor
Source: JCI journal article supplement (doi:10.1172/jci133780), 2020-07-14

Full unedited gel for Figure 2A

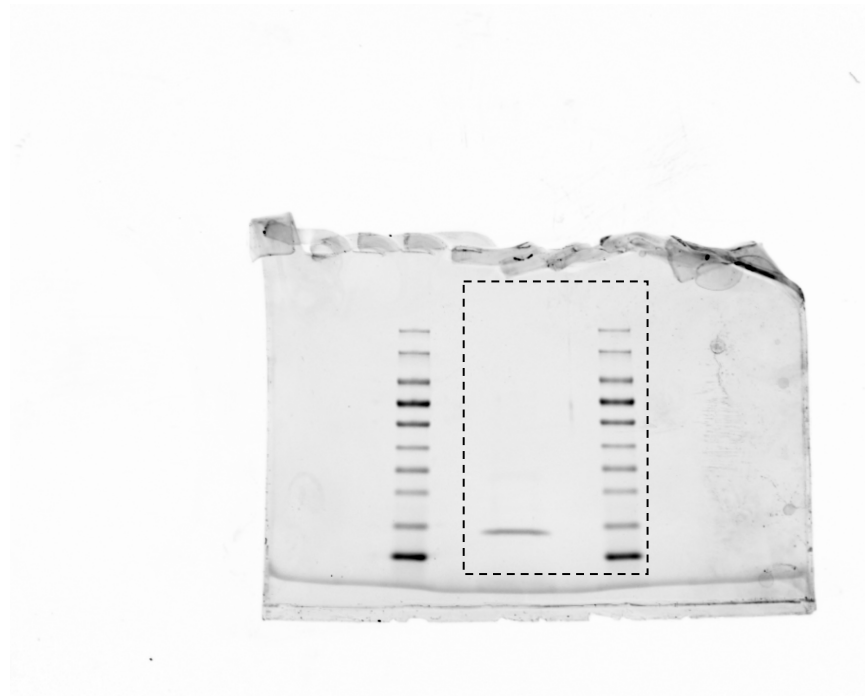

Full unedited blots for Figures 2G,H

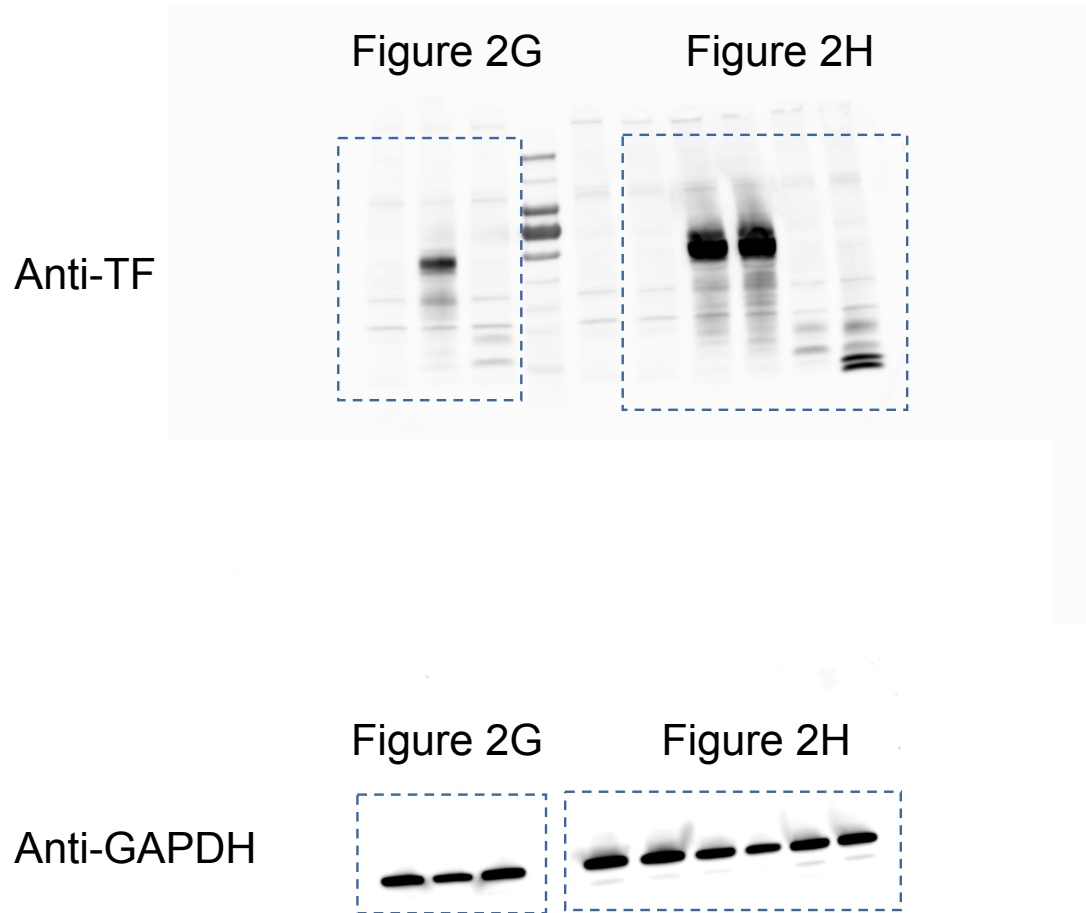

Full unedited blots for Figure 3G

Anti-TF

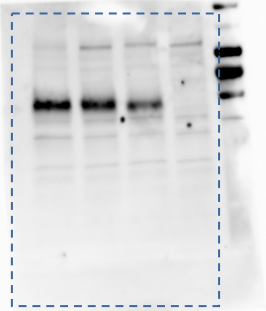

Anti-GAPDH

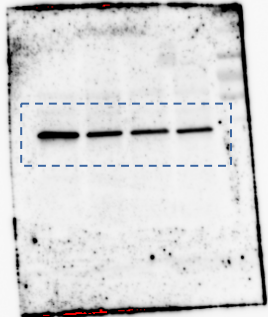

Supplement: sd1 [file 1]
